# Supplementary material for: Genetic Detection and a Method to Study the Ecology of Deadly Cubozoan Jellyfish
Source: MDPI journal article supplement (doi:10.3390/d14121139), 2022-12-19
Supplement: s1 [file s1]

## Supplementary Materials

**Table S1** - Primers used to isolate 584 bp length of jellyfish mt 16S rRNA gene.

| Assay                     | Label                    | Sequence (5'-3')                               | Target Sequence Length (bp) |
|---------------------------|--------------------------|------------------------------------------------|-----------------------------|
| Universal Jellyfish Assay | 16SL_F<br>Aa_H16S_15141H | GACTGTTTACCAAAAACATA<br>AGATTTTAATGGTCGAACAGAC | 584                         |

**Table S2** - List of marine fish species NCBI accession numbers and country of origin for all existing mt 16S rRNA/complete genome sequences used for *in silico* testing of the endogenous control assay.

| Species                            | Accession Number | Country of Origin | <i>In silico</i> Amplification |
|------------------------------------|------------------|-------------------|--------------------------------|
| <i>Lates calcarifer</i>            | KR349919         | Australia         | Yes                            |
| <i>Platycephalus fuscus</i>        | KT862661         | Australia         | Yes                            |
| <i>Acanthopagrus butcheri</i>      | KX234643         | Australia         | Yes                            |
| <i>Acanthopagrus australis</i>     | JN688792         | China             | Yes                            |
| <i>Acanthopagrus pacificus</i>     | MK919144         | Vietnam           | Yes                            |
| <i>Rhabdosargus sarba</i>          | KM272585         | China             | Yes                            |
| <i>Scartelaos histophorus</i>      | NC_017888        | China             | Yes                            |
| <i>Eleutheronema tetradactylum</i> | KT593869         | China             | Yes                            |
| <i>Lutjanus johnii</i>             | NC_024572        | Australia         | Yes                            |
| <i>Sillaginidae punctatus</i>      | MF572031         | China             | Yes                            |
| <i>Triacanthus blaculeatus</i>     | AP009174         | Japan             | Yes                            |
| <i>Monodactylus argenteus</i>      | NC_009858        | Japan             | Yes                            |
| <i>Hephaestus fuliginosus</i>      | MH606192         | China             | Yes                            |
| <i>Gnathanodon speciosus</i>       | NC_054367        | China             | Yes                            |

**Table S3** - Primer selection characteristics.

| Selection Characteristics          | Sense Primer | Anti-Sense Primer | MGB Probe |
|------------------------------------|--------------|-------------------|-----------|
| bp length                          | 24           | 22                | 20        |
| T <sub>m</sub> (Nearest Neighbour) | 64.98°C      | 65.23°C           | N/A       |
| GC%                                | 45.8         | 54.5              | 45        |
| Hairpins                           | 34.4 (weak)  | None              | None      |

|              |      |      |      |
|--------------|------|------|------|
| GC Clamps    | 2    | 3    | N/A  |
| Self-Dimer   | None | None | None |
| Hetero-Dimer | None | None | None |

**Table S4** - Base pair (bp) differences between *Chironex fleckeri* identifiers and sympatric jellyfish species.

| Species                   | Total bp Differences | Primer bp Differences (Sense & Anti-Sense) | Probe bp Differences |
|---------------------------|----------------------|--------------------------------------------|----------------------|
| <i>Alatina alata</i>      | 17                   | 6 & 5                                      | 6                    |
| <i>Carukia barnesi</i>    | 28                   | 8 & 8                                      | 12                   |
| <i>Carybdea xaymacana</i> | 32                   | 11 & 10                                    | 11                   |
| <i>Copula sivickisi</i>   | 22                   | 8 & 5                                      | 9                    |
| <i>Morbakka fenneri</i>   | 31                   | 10 & 7                                     | 14                   |
| <i>Tamoya ohboya</i>      | 33                   | 9 & 8                                      | 16                   |

**Table S5** - Efficiencies of the *Chironex fleckeri* specific detection assay when independent and multiplexed with the endogenous control assay.

|                | Target Assay Only | Multiplexed Assay |
|----------------|-------------------|-------------------|
| Efficiency (%) | 93.47             | 92.68             |
| R <sup>2</sup> | 0.999             | 0.999             |
| Slope          | -3.48             | -3.51             |

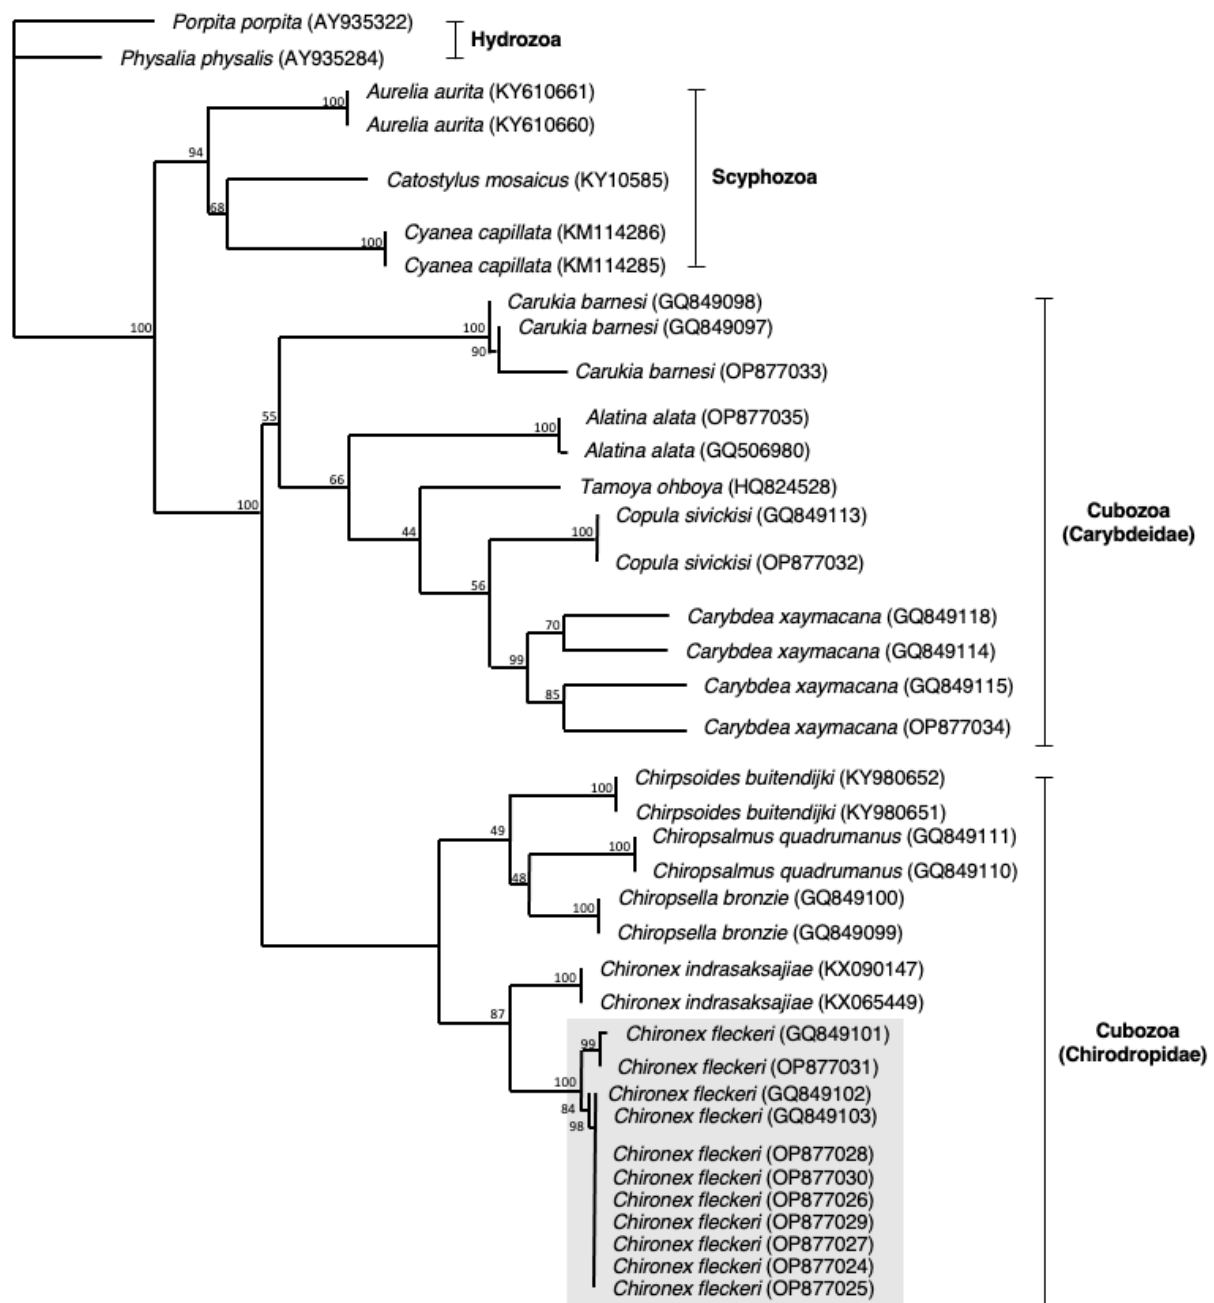

**Figure S1** - Intraspecific similarity of *Chironex fleckeri* sequences and interspecific divergence between *C. fleckeri* and sympatric species for the mt 16S rRNA gene. Bootstrap values greater than 50% are displayed above the branch nodes. The tree was maximum likelihood generated utilising the substitution models GTR+F+I+G4 with sequence regions ranging from ≤418 - ≥763 bp

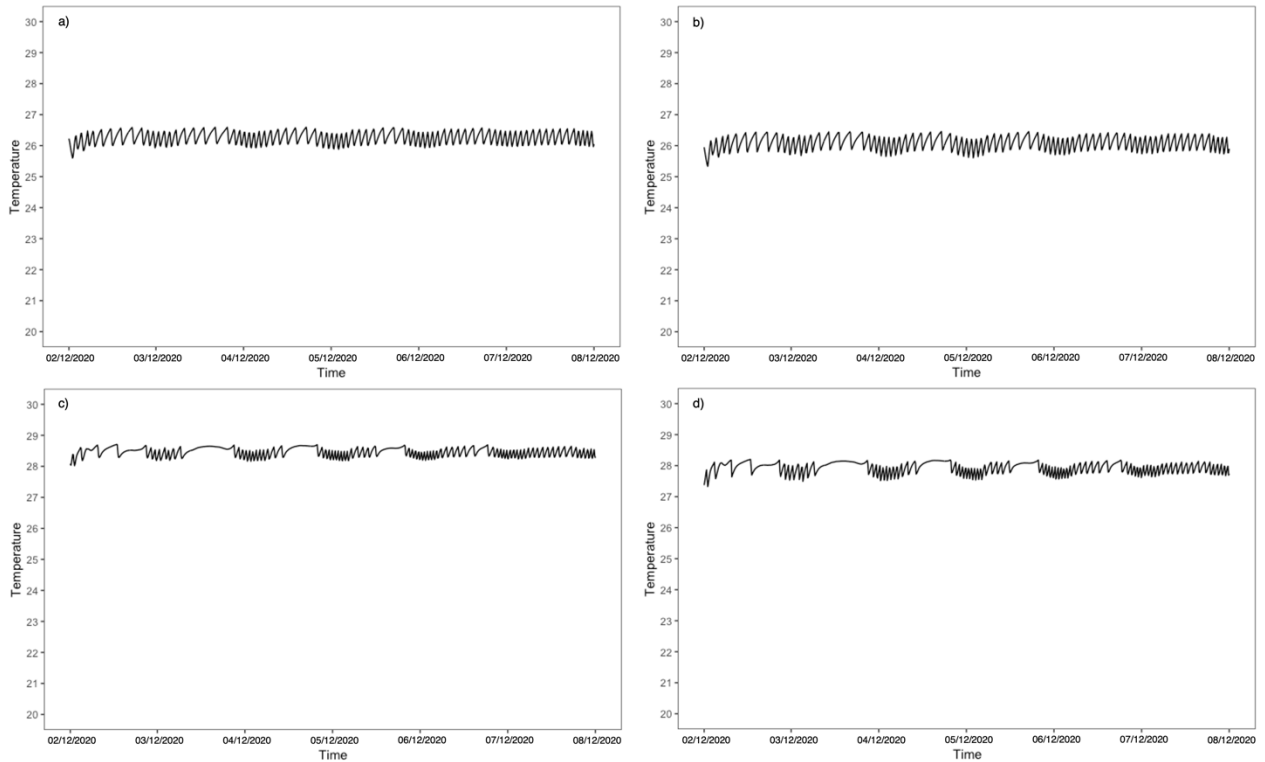

**Figure S2** – Tinytag TG-3100 data logger temperature data for duration of the *C. fleckeri* eDNA decay experiment. a) Logger 1 – 26 °C bath, b) Logger 2 – 26 °C bath, c) Logger 3 – 28 °C bath, d) Logger 4 – 28 °C bath.

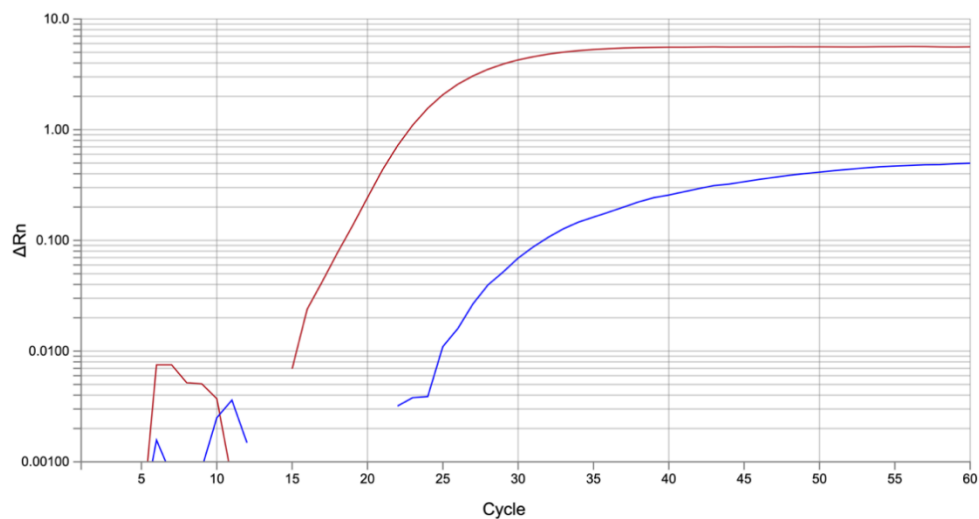

**Figure S3** - Amplification Plot of Multiplexed Assay showing amplification of FAM dye-labelled *Chironex*-specific assay (red) and VIC dye-labelled endogenous control assay (blue).
